# Supplementary material for: Integrative Taxonomy Reveals a New Species of the Genus Lejeunea (Marchantiophya: Lejeuneaceae) from Peninsular Malaysia
Source: MDPI journal article supplement (doi:10.3390/plants11131642), 2022-06-21
Supplement: s1 [file s1]

**Table S1.** Taxa used in the present study with information about the origin of the studied material, vouchers, as well as GenBank accession numbers are included. New sequences in boldface.

| Taxon                                                 | Origin              | Collector                                  | GenBank Accession No. |                 |                 |
|-------------------------------------------------------|---------------------|--------------------------------------------|-----------------------|-----------------|-----------------|
|                                                       |                     |                                            | <i>rbcl</i>           | <i>trnLF</i>    | ITS             |
| <i>Harpalejeunea grandis</i> Grolle & M.E.Reiner      | Colombia            | Cleef 6450 (GOET)                          | KC313144              | KC313184        | KC313106        |
| <i>H. grandistipula</i> R.M.Schust.                   | Ecuador             | Schäfer-Verwimp et al. 24163/B (GOET)      | KC313145              | KC313185        | KC313107        |
| <i>Lejeunea acuta</i> Mitt.                           | Kenya               | Chuah-Petiot Mb 22 (JE)                    | KF556384              | KF556134        | KF555917        |
| <i>L. adpressa</i> Nees                               | Dominican Rep.      | Schäfer-Verwimp & Verwimp 26931/B (GOET)   | KF556386              | KF556136        | KF555919        |
| <i>L. alata</i> Gottsche                              | Malaysia            | Schäfer-Verwimp & Verwimp 18912 (GOET)     | -----                 | KF556140        | KF555922        |
| <i>L. geisslerae</i> Pócs                             | Samoa               | Bartlett 32262b (JE)                       | MN822951              | MN823014        | MN818974        |
| <i>L. albescens</i> (Steph.) Mizut.                   | Sabah, Borneo       | G.E.Lee 1533 (UKMB)                        | MN822952              | MN823015        | MN818975        |
| <i>L. amaniensis</i> E.W.Jones                        | Kenya               | Malombe & Chituyi 5006/Si.1a55 (EGR)       | KF556392              | KF556143        | KF556603        |
| <i>L. anisophylla</i> Nees & Mont.                    | Sabah, Borneo       | G.E.Lee 2145 (UKMB)                        | MN822953              | MN823016        | MN818976        |
| <i>L. apiculata</i> Sande Lac.                        | Peninsular Malaysia | Pócs & Pócs 1003/AC (EGR)                  | MN823003              | MN823017        | MN818977        |
| <i>L. aquatica</i> Horik.                             | Japan               | Higuchi 1021 (JE)                          | -----                 | KF556155        | KF555933        |
| <i>L. asperima</i> Spruce                             | Panama              | Schäfer-Verwimp & Verwimp 30817 (GOET)     | KF556402              | KF556157        | KF555935        |
| <i>L. asperula</i> (Steph.) Mizut.                    | Papua New Guinea    | Streimann 40815 (JE)                       | -----                 | KF556156        | KF555934        |
| <i>L. bermudiana</i> (A.Evans) R.M.Schust.            | USA                 | Shaw 14939 (DUKE)                          | -----                 | KF556158        | KF555936        |
| <i>L. boryana</i> Mont.                               | French Guiana       | Holz FG 00-0103 (GOET)                     | KF556405              | KF556159        | KF555938        |
| <i>L. brenanii</i> E.W.Jones                          | São Tomé            | Shevock 39785 (M)                          | MN822954              | MN823018        | MN818978        |
| <i>L. cancellata</i> Nees & Mont.                     | Costa Rica          | Schäfer-Verwimp & Holz SV/H- 0507/C (GOET) | KF556409              | KF556164        | KF555942        |
| <i>L. capensis</i> Gottsche                           | Brazil              | Schäfer-Verwimp & Verwimp 15057 (GOET)     | -----                 | KF556167        | KF555943        |
| <i>L. caracensis</i> Lindenb.                         | Venezuela           | Picón et al. 00227/CD (EGR)                | MN822955              | MN823019        | MN818979        |
| <i>L. catinulifera</i> Spruce                         | Ecuador             | Wilson et al. 04-01 (GOET)                 | DQ983687              | DQ987432        | DQ987328        |
| <i>L. cavifolia</i> (Ehrh.) Lindb.                    | Germany             | Heinrichs 3695 (GOET)                      | AY548102              | DQ238581        | DQ987259        |
| <i>L. cerina</i> (Lehm. & Lindenb.) Gottsche et al.   | Costa Rica          | Schäfer-Verwimp & Holz SV/H- 0471 (GOET)   | KF556425              | KF556180        | KF555955        |
| <i>L. cocoas</i> Mitt.                                | Peninsular Malaysia | G.E.Lee 2339 (UKMB)                        | MN822957              | MN823021        | MN818963 (ITS1) |
| <b><i>L. cocoas</i> Mitt.</b>                         | <b>Thailand</b>     | <b>G.E.Lee 2496 (UKMB)</b>                 | <b>ON646222</b>       | <b>ON646224</b> | -----           |
| <i>L. colensoana</i> (Steph.) M.A.M.Renner            | New Zealand         | Renner 300140 (AK)                         | -----                 | JF308578        | JF308549        |
| <i>L. compacta</i> (Steph.) Steph.                    | China               | Long 18826 (E)                             | MN822956              | MN823020        | MN818980        |
| <i>L. compressiuscula</i> (Steph.) G.E.Lee & Heinrich | Indonesia           | Schäfer-Verwimp & Verwimp 24923/E (GOET)   | KF556519              | KF556290        | KF556050        |
| <i>L. conformis</i> Nees & Mont.                      | São Tomé            | Shevock 34483 (EGR)                        | MN822958              | MN823022        | MN818981        |
| <i>L. controversa</i> Gottsche                        | French Guiana       | Hartmann et al. 04-033 (GOET)              | KF556432              | KF556189        | KF555964        |
| <i>L. corynantha</i> Spruce                           | Dominica            | Schäfer-Verwimp & Verwimp 17961/A (GOET)   | MN995825              | MN995826        | MN990423        |

|                                                   |                      |                                          |          |          |                       |
|---------------------------------------------------|----------------------|------------------------------------------|----------|----------|-----------------------|
| <i>L. cristulata</i> (Steph.) M.E.Reiner & Goda   | Brazil               | Giancotti 17 (JE)                        | -----    | KF556193 | KF555966              |
| <i>L. curviloba</i> Steph.                        | Bhutan               | Long 10611 (JE)                          | -----    | KF556195 | KF555967              |
| <i>L. cyathophora</i> Mitt.                       | Costa Rica           | Schäfer-Verwimp & Holz SV/H- 229 (M)     | MN822959 | MN823023 | MN818982              |
| <i>L. debilis</i> (Lehm. & Lindenb.) Nees & Mont. | Costa Rica, La Gamba | Schluder 7 (GOET)                        | KF556437 | KF556197 | KF555969              |
| <i>L. deplanata</i> Nees                          | Ecuador, Pichincha   | Schäfer-Verwimp et al. 24502/C (GOET)    | KF556439 | KF556199 | KF555971              |
| <i>L. dimorpha</i> Kodama                         | Peninsular Malaysia  | G.E.Lee 2211 (UKMB)                      | MN822960 | MN823024 | MN818983              |
| <i>L. dipterocarpa</i> E.W.Jones                  | Equatorial Guinea    | Müller B316 (EGR)                        | MN822961 | MN823025 | MN818984              |
| <i>L. dipterota</i> (Eifrig) G.E.Lee              | Sabah, Borneo        | G.E.Lee 1802 (UKMB)                      | MN822962 | MN823026 | MN818985              |
| <i>L. discreta</i> Lindenb.                       | Peninsular Malaysia  | G.E.Lee 2328 (UKMB)                      | MN822963 | MN823027 | MN818986              |
| <i>L. drehwaldii</i> Heinrichs & Schäf.-Verw.     | Peru                 | Drehwald 4384 (JE)                       | KF556445 | KF556207 | KF555978              |
| <i>L. eckloniana</i> Lindenb.                     | Madeira              | Stech 04-433 (L)                         | KF556447 | KF556211 | KF555983              |
| <i>L. eifrigii</i> Mizut.                         | Peninsular Malaysia  | G.E.Lee 2334 (UKMB)                      | MN822964 | MN823028 | MN818987              |
| <i>L. exilis</i> (Reinw. et al.) Grolle           | Indonesia            | Schäfer-Verwimp & Verwimp 25231 (GOET)   | KF556449 | KF556213 | KF555985              |
| <i>L. flava</i> (Sw.) Nees                        | Dominican Rep.       | Schäfer-Verwimp & Verwimp 26855/B (GOET) | KF556479 | KF556243 | KF556009              |
| <i>L. fleischeri</i> (Steph.) Mizut.              | Indonesia            | Schäfer-Verwimp & Verwimp 24809/A (GOET) | MN822965 | MN823029 | MN818988              |
| <i>L. glaucescens</i> Gottsche                    | Brazil               | Schäfer-Verwimp & Verwimp 9724 (M)       | MN822966 | MN823060 | MN818989              |
| <i>L. globosiflora</i> (Steph.) Steph.            | Chile                | Gradstein 12418 (GOET)                   | MN822967 | MN823030 | MN818962/<br>MN818960 |
| <i>L. gradsteinii</i> G.E.Lee et al.              | Sabah, Borneo        | G.E.Lee 1885 (UKMB)                      | MN822968 | MN823031 | MN818990              |
| <i>L. grossitexta</i> (Steph.) M.E.Reiner & Goda  | Panama               | Schäfer-Verwimp & Verwimp 31000 (GOET)   | KF556491 | KF556256 | KF556020              |
| <i>L. helmsiana</i> Steph.                        | New Zealand          | Renner 300069 (AK)                       | -----    | JF308569 | JF308540              |
| <i>L. hepaticola</i> Steph.                       | Kenya                | Pócs & Pócs 04004/K (EGR)                | MN822969 | MN823032 | MN818991              |
| <i>L. hibernica</i> Grolle                        | Ireland              | Long 11743 (JE)                          | -----    | KF556257 | KF556021              |
| <i>L. holtii</i> Spruce                           | Madeira              | Drehwald & Drehwald 3719 (GOET)          | KF556492 | KF556258 | KF556022              |
| <i>L. ibadana</i> A.J.Harr & E.W.Jones            | Príncipe Isl.        | Shevock 42309 (EGR)                      | MN822970 | MN823033 | MN818992              |
| <i>L. intricata</i> J.B.Jack & Steph.             | Ecuador              | Schäfer-Verwimp & Nebel 33217 (GOET)     | -----    | -----    | KF556023              |
| <i>L. isocalycina</i> (Nees) Spruce               | Brazil               | Costa & Gradstein 3720 (GOET)            | KF556496 | KF556262 | KF556027              |
| <i>L. isophylla</i> E.W.Jones                     | Madagascar           | Lübenau 21 (EGR)                         | KF556497 | KF556263 | KF556028              |
| <i>L. japonica</i> Mitt.                          | Japan                | Mizutani 15618 (L)                       | KF556499 | KF556265 | KF556030              |
| <i>L. kinabalensis</i> Mizut.                     | Sabah, Borneo        | G.E.Lee 2138 (UKMB)                      | MN822971 | MN823034 | MN818993              |
| <i>L. konosensis</i> Mizut.                       | China                | Long & Shevock 37403 (E)                 | MN822972 | MN823035 | MN818994              |

|                                                       |                        |                                                       |                 |                 |                    |
|-------------------------------------------------------|------------------------|-------------------------------------------------------|-----------------|-----------------|--------------------|
| <i>L. kuerschneriana</i> Pócs                         | Kenya                  | Chuah et al. 3017 (EGR)                               | MN822973        | MN823036        | MN818995           |
| <i>L. laeta</i> (Lehm. & Lindenb.)<br>Gottsche et al. | Ecuador                | Schäfer-Verwimp et al.<br>24412 (GOET)                | -----           | KF556267        | KF556032           |
| <i>L. laetevirens</i> Nees & Mont.                    | Dominican<br>Rep.      | Schäfer-Verwimp &<br>Verwimp<br>27079 (GOET)          | KF556508        | KF556275        | KF556037           |
| <i>L. lamacerina</i> (Steph.) Schiffn.                | Azores                 | Schäfer-Verwimp &<br>Verwimp 29394 (GOET)             | KF556510        | KF556279        | KF556041           |
| <i>L. leratii</i> (Steph.) Mizut.                     | New<br>Caledonia       | Larrín 35964 (EGR)                                    | MN822974        | MN823062        | MN818996           |
| <i>L. lomana</i> E.W.Jones                            | Réunion                | Pócs 08064/L (EGR)                                    | KF556388        | KF556138        | KF555921           |
| <i>L. lumbricoides</i> (Nees) Nees                    | Peninsular<br>Malaysia | G.E.Lee 1429 (UKMB)                                   | MN822975        | MN823037        | MN818997           |
| <i>L. micholitzii</i> Mizut.                          | Sri Lanka              | Schäfer-Verwimp &<br>Verwimp<br>16374 (M)             | MN822976        | MN823063        | MN818998           |
| <i>L. malaysiana</i> G.E. Lee & Pócs                  | Indian Ocean           | Seaward 108088 (JE)                                   | -----           | KF556187        | KF555962           |
| <i>L. malaysiana</i> G.E. Lee & Pócs                  | Indonesia              | Schäfer-Verwimp &<br>Verwimp 21050 (GOET)             | KF556430        | KF556186        | KF555961           |
| <b><i>L. malaysiana</i> G.E. Lee &amp; Pócs</b>       | <b>Indonesia</b>       | <b>Schäfer-Verwimp &amp;<br/>Verwimp 16892 (GOET)</b> | <b>ON646223</b> | <b>ON646225</b> | <b>ON705052</b>    |
| <i>L. microloba</i> Taylor                            | Fiji Isls.             | Pócs 08013/Y (EGR)                                    | KF556520        | KF556291        | KF556051           |
| <i>L. mimula</i> Hürl.                                | Sabah, Borneo          | G.E.Lee 1749 (UKMB)                                   | MN822977        | MN823038        | MN818999           |
| <i>L. mizutanii</i> Grolle                            | New<br>Caledonia       | von Konrat s.n. (EGR)                                 | MN822978        | MN823039        | MN819000           |
| <i>L. monimiae</i> (Steph.) Steph.                    | Ecuador                | Schäfer-Verwimp &<br>Preussing 23226/A (GOET)         | KF556526        | KF556298        | KF556055           |
| <i>L. multidentata</i> M.E.Reiner &<br>Mustelier      | Dominican<br>Rep.      | Pócs & Pócs 03157/A (EGR)                             | KF556527        | KF556299        | KF556056           |
| <i>L. neelgherriana</i> Gottsche                      | Japan                  | Higuchi 0791954 (L)                                   | -----           | KF556301        | KF556058           |
| <i>L. nepalensis</i> (Steph.) H.A.Mill. et<br>al.     | Nepal                  | Long 17250 (JE)                                       | -----           | KF556302        | KF556059           |
| <i>L. obscura</i> Mitt.                               | Indonesia              | Schäfer-Verwimp &<br>Verwimp 24957/C (M)              | MN822980        | MN823041        | MN819002           |
| <i>L. obtusangula</i> Spruce                          | Bolivia                | Krömer 869 (GOET)                                     | KF556532        | KF556307        | KF556063           |
| <i>L. obtusata</i> Gottsche                           | Kenya                  | Pócs et al. 04042/G (EGR)                             | MN822979        | MN823040        | MN819001           |
| <i>L. oligoclada</i> Spruce                           | Brazil                 | Schäfer-Verwimp &<br>Verwimp 13590 (GOET)             | KF556533        | KF556308        | KF556064           |
| <i>L. oracula</i> M.A.M.Renner                        | New Zealand            | Renner 300078 (AK)                                    | -----           | JF308571        | JF308542           |
| <i>L. osculatiana</i> De Not.                         | Panama                 | Schäfer-Verwimp &<br>Verwimp 30958 (GOET)             | KF556538        | KF556314        | KF556631           |
| <i>L. pallescens</i> Mitt.                            | Ecuador                | Schäfer-Verwimp 32731<br>(GOET)                       | KF556540        | -----           | KF556069           |
| <i>L. parva</i> (S.Hatt.) Mizut.                      | Japan                  | Mizutani 15293 (L)                                    | KF556542        | KF556318        | KF556072           |
| <i>L. papilionacea</i> Prantl.                        | São Tomé               | Shevock 42335 (EGR)                                   | MN822981        | MN823061        | MN818961<br>(ITS2) |
| <i>L. patersonii</i> (Steph.) Steph.                  | Thailand               | G.E.Lee 2525 (UKMB)                                   | MN822982        | MN823042        | MN819003           |
| <i>L. patriciae</i> Schäfer-Verw.                     | Peninsular<br>Malaysia | Pócs et al. 13161/2 (EGR)                             | MN822983        | MN823043        | MN819004           |
| <i>L. paucidentata</i> (Steph.) Grolle                | Cuba                   | Pócs & Caluff 9199/CL (JE)                            | -----           | KF556321        | KF556075           |
| <i>L. pectinella</i> Mizut.                           | Sabah, Borneo          | Lee 1672 (UKMB)                                       | MN822984        | MN823044        | MN819005           |
| <i>L. phyllobola</i> Nees & Mont.                     | Ecuador                | Noeske et al. 204 (GOET)                              | KF556600        | KF556322        | KF556076           |
| <i>L. pterigonia</i> (Lehm. & Lindenb.)<br>Mont.      | Bolivia                | Churchill et al. 21851<br>(GOET)                      | KF556546        | KF556325        | KF556078           |

|                                                             |                       |                                           |          |          |                    |
|-------------------------------------------------------------|-----------------------|-------------------------------------------|----------|----------|--------------------|
| <i>L. ptosimophylla</i> C.Massal.                           | Argentina             | Vinocur MER502 (GOET)                     | -----    | MN823045 | MN818964<br>(ITS1) |
| <i>L. puiggariana</i> Steph.                                | Dominican Rep.        | Schäfer-Verwimp & Verwimp 27016/A (GOET)  | KF556550 | KF556329 | KF556082           |
| <i>L. pulchriflora</i> (Pearson) G.E.Lee et al.             | Tanzania              | Pócs 89126/M (EGR)                        | KT897948 | KT897953 | KT897943           |
| <i>L. pulverulenta</i> (Gottsche ex Steph.) M.E.Reiner      | Bolivia               | Reiner-Drehwald & Drehwald 4517 (GOET)    | KF556552 | KF556331 | KF556084           |
| <i>L. ramosissima</i> Steph.                                | São Tomé and Príncipe | Shevock 34348A (EGR)                      | KF556554 | KF556333 | KF556086           |
| <i>L. ramulosa</i> (Herzog) R.M.Schust.                     | Costa Rica            | Schäfer-Verwimp & Holz SV/H-0229/A (GOET) | KF556555 | KF556335 | KF556088           |
| <i>L. reflexistipula</i> (Lehm. & Lindenb.) Gottsche et al. | Ecuador (III)         | Schäfer-Verwimp & Nebel 33162 (GOET)      | KF556559 | KF556340 | KF556092           |
| <i>L. reineriae</i> Ilk.-Borg.                              | Fiji Isl.             | Pócs & Pócs 03261/AC (EGR)                | MN822985 | MN823046 | MN819006           |
| <i>L. rotundifolia</i> Mitt.                                | Costa Rica, Cartago   | Schäfer-Verwimp & Holz SV/H-0378 (GOET)   | KF556567 | KF556348 | KF556099           |
| <i>L. ruthii</i> (A.Evans) R.M.Schust.                      | USA, Tennessee        | Zartman 681 (DUKE)                        | KF556569 | -----    | KF556634           |
| <i>L. sikorae</i> (Steph.) Steph.                           | Madagascar            | Pócs & Szabó 9878/EZ (EGR)                | MN822986 | MN823047 | MN819007           |
| <i>L. soae</i> R.L.Zhu et al.                               | China                 | Long 24473b (E)                           | MN822987 | MN823048 | MN819008           |
| <i>L. sordida</i> (Nees) Nees                               | Papua New Guinea      | Kumei 15 (JE)                             | MN822988 | MN823049 | MN819009           |
| <i>L. sporadica</i> Besch. & Spruce                         | Panama                | Schäfer-Verwimp & Verwimp 31033 (GOET)    | KF556583 | -----    | KF556117           |
| <i>L. stenodentata</i> M.A.M.Renner & Pócs                  | Papua New Guinea      | Streimann 41784 (JE)                      | MN822989 | MN823050 | MN819010           |
| <i>L. stephaniana</i> Mizut.                                | Sabah, Borneo         | G.E.Lee 1515 (UKMB)                       | MN822990 | -----    | MN819011           |
| <i>L. stevensiana</i> (Steph.) Mizut.                       | China                 | Long 37118 (E)                            | MN822991 | MN823051 | MN819012           |
| <i>L. subolivacea</i> Mizut.                                | Bangladesh            | Long 28096 (E)                            | MN822992 | MN823052 | MN819013           |
| <i>L. subplana</i> (Steph.) C.Bastos                        | Brazil                | Schäfer-Verwimp & Verwimp 6953/B (M)      | MN822993 | MN823053 | MN819014           |
| <i>L. subspatulata</i> Spruce                               | Dominican Rep.        | Gradstein 6643 (GOET)                     | KF556585 | KF556367 | KF556119           |
| <i>L. sulphurea</i> (Lehm. & Lindenb.) Spruce               | Guadeloupe            | Schäfer-Verwimp 22453 (GOET)              | MN822994 | MN823054 | MN819015           |
| <i>L. tapajosensis</i> Spruce                               | Ecuador               | Nöske et al. 204 (GOET)                   | KF556589 | KF556371 | KF556122           |
| <i>L. tasmanica</i> Gottsche et al.                         | New Zealand           | Renner 872054 (NSW)                       | -----    | JF308581 | JF308552           |
| <i>L. terricola</i> Spruce                                  | Argentina             | Reiner MER1148 (M)                        | MN822995 | MN823055 | MN819016           |
| <i>L. thallophora</i> (Eifrig) Gradst.                      | Indonesia             | Abrahamczyk 05285 (JE)                    | MN822996 | MN823056 | MN819017           |
| <i>L. topoensis</i> Gradst. & M.E.Reiner                    | Ecuador               | Gradstein & Jost 10063 (GOET)             | DQ983712 | DQ987416 | DQ987312           |
| <i>L. trinitensis</i> Lindenb. & Gottsche                   | Brazil                | Vital 10.168 (JE)                         | KF556594 | KF556376 | KF556127           |
| <i>L. tuberculosa</i> Steph.                                | São Tomé and Príncipe | Shevock 42453 (EGR)                       | MN822997 | MN823057 | MN819018           |
| <i>L. tumida</i> Mitt.                                      | New Zealand           | Renner 299949 (AK)                        | -----    | JF308556 | JF308527           |
| <i>L. umbilicata</i> (Nees) Nees et al.                     | Indonesia             | Schäfer-Verwimp & Verwimp 16954 (GOET)    | KF556597 | KF556379 | KF556130           |

|                                                           |                     |                                        |          |          |          |
|-----------------------------------------------------------|---------------------|----------------------------------------|----------|----------|----------|
| <i>L. urbanii</i> Steph.                                  | Dominican Rep.      | Schäfer-Verwimp & Verwimp 27006 (GOET) | MN822998 | MN823058 | MN819019 |
| <i>L. utriculata</i> (Steph.) Mizut.                      | Peninsular Malaysia | Schäfer-Verwimp & Verwimp 18900/C (M)  | MN822999 | MN823059 | MN819020 |
| <i>L. wightii</i> Lindenb.                                | Thailand            | Schäfer-Verwimp & Verwimp 23844 (M)    | MN823000 | MN823004 | MN819021 |
| <i>Microlejeunea filicuspis</i> (Steph.) Heinrichs et al. | Fiji Isls.          | Pócs & Pócs 03304/A (EGR)              | KC313138 | KC313178 | KC313100 |
| <i>M. latitans</i> (Hook.f & Taylor) Heinrichs et al.     | New Zealand         | Schäfer-Verwimp & Verwimp 13869 (JE)   | KC313146 | KC313186 | KC313108 |

---
